# Supplementary material
Source: MDPI journal article supplement (https://www.mdpi.com/2073-4395/11/7/1431)
Supplement: s1 [file s1]

Table S1. Pearson correlation coefficients between chemical compounds and biological properties of EOs. Total phenol content (TPC); antioxidant activity; antimicrobial activity against: *B. amyloliquefaciens* (BA), *B. subtilis* (BS); *A. niger* (AN), *P. roqueforti* (PR).

|                 | TPC         | antioxidant<br>activity | BA          | BS          | AN          | PR          |
|-----------------|-------------|-------------------------|-------------|-------------|-------------|-------------|
| alfa pinene     | -0,35       | -0,34                   | -0,33       | -0,35       | -0,56       | -0,51       |
| Myrcene         | -0,22       | -0,17                   | -0,38       | -0,29       | -0,72       | -0,65       |
| p-cymene        | <i>0,83</i> | <i>0,88</i>             | <i>0,69</i> | <i>0,74</i> | <i>0,57</i> | <i>0,58</i> |
| Eucalyptol      | -0,44       | -0,43                   | -0,54       | -0,48       | -0,69       | -0,64       |
| gamma Terpinene | <i>0,85</i> | <i>0,88</i>             | <i>0,71</i> | <i>0,74</i> | <i>0,58</i> | <i>0,60</i> |
| Linalol         | -0,05       | -0,04                   | -0,05       | -0,08       | -0,28       | -0,24       |
| Camphor         | -0,31       | -0,31                   | -0,49       | -0,34       | -0,49       | -0,45       |
| Thymol          | <i>0,86</i> | <i>0,89</i>             | <i>0,73</i> | <i>0,76</i> | <i>0,59</i> | <i>0,62</i> |
| Carvacrol       | <i>0,79</i> | <i>0,86</i>             | <i>0,65</i> | <i>0,74</i> | <i>0,55</i> | <i>0,54</i> |
| Caryophyllene   | <i>0,53</i> | <i>0,58</i>             | <i>0,29</i> | <i>0,40</i> | <i>0,09</i> | <i>0,14</i> |
| Pulegone        | -0,44       | -0,43                   | -0,34       | -0,40       | <i>0,17</i> | -0,03       |
| Iso -Menthone   | -0,43       | -0,42                   | -0,33       | -0,40       | <i>0,12</i> | -0,05       |

Values in italic character indicate significant correlation ( $P < 0.05$ ).
